# Supplementary material
Source: PubMed Central journal article supplement (PMC2556622)
Supplement: blood-2007-11-121590_1.pdf [file blood-2007-11-121590_1.pdf]

|           | WT   | LAT-/- | LAB-/- | 2KO  |
|-----------|------|--------|--------|------|
| % CD122   | 97.3 | 99.1   | 95.8   | 97.7 |
| STD       | 0.1  | 0.2    | 1.5    | 0.4  |
|           |      |        |        |      |
| % CD127   | 7.6  | 4.8    | 12.4   | 9.9  |
| STD       | 0.3  | 2.0    | 3.9    | 3.1  |
|           |      |        |        |      |
| % CD94    | 83.1 | 94.0   | 85.6   | 90.8 |
| STD       | 5.1  | 1.7    | 4.1    | 2.7  |
|           |      |        |        |      |
| % NKG2ACE | 48.4 | 55.9   | 53.7   | 48.0 |
| STD       | 2.2  | 10.3   | 3.5    | 12.6 |
